# Supplementary material
Source: publisher site journal article supplement (https://www.dovepress.com/article/466742)

**Supplemental Table 1:** Patient clinical characteristics as reported by person living with schizophrenia and caregiver proxy.

|  | **Total (n=300)** | |
| --- | --- | --- |
| Time since schizophrenia diagnosis |  |  |
| Less than 1 year ago | 16 | 5.3% |
| Between 1 and 3 years ago | 54 | 18.0% |
| Between 3 and 5 years ago | 93 | 31.0% |
| Between 5 and 7 years ago | 59 | 19.7% |
| Between 7 and 10 years ago | 15 | 5.0% |
| 10 or more years ago | 62 | 20.7% |
| Don't know/not sure | 1 | 0.3% |
| Current psychiatric medications* |  |  |
| Oral antipsychotic | 300 | 100.0% |
| Long-acting injectable antipsychotic | 90 | 30.0% |
| Antidepressant | 153 | 51.0% |
| Antianxiety | 127 | 42.3% |
| Mood stabilizer | 116 | 38.7% |
| Stimulant | 47 | 15.7% |
| Current non-pharmacological treatments* |  |  |
| Inpatient care | 89 | 29.7% |
| Outpatient care | 195 | 65.0% |
| Substance use treatment | 63 | 21.0% |
| Housing support | 47 | 15.7% |
| Employment/vocational support | 38 | 12.7% |
| Commonly used antipsychotics* |  |  |
| Abilify | 95 | 31.7% |
| Seroquel | 72 | 24.0% |
| Risperdal | 53 | 17.7% |
| Geodon | 48 | 16.0% |
| Haldol | 49 | 16.3% |
| Latuda | 45 | 15.0% |
| Zyprexa | 48 | 16.0% |

*Respondents could select more than one option and thus results total more than 100%.

**Supplemental Table 2:** Demographics and clinical characteristics of caregiver proxies.

|  | **Proxy (n=100)** | | **Patient (n=200)** | | **Total (n=300)** | |
| --- | --- | --- | --- | --- | --- | --- |
| Age (mean [SD, range]) | 40.3 | 13.0, 12-72 | 41.7 | 12.2, 20-96 | 41.3 | 12.5, 18-96 |
| Gender (n, %) |  |  |  |  |  |  |
| Male | 38 | 38.0% | 94 | 47.0% | 132 | 44.0% |
| Female | 60 | 60.0% | 104 | 52.0% | 164 | 54.7% |
| Non-binary | 2 | 2.0% | 2 | 1.0% | 4 | 1.3% |
| Race* |  |  |  |  |  |  |
| White | 72 | 72.0% | 141 | 70.5% | 213 | 71.0% |
| Black | 20 | 20.0% | 48 | 24.0% | 68 | 22.7% |
| Asian | 1 | 1.0% | 5 | 2.5% | 6 | 2.0% |
| American Indian/Alaska Native | 14 | 14.0% | 8 | 4.0% | 22 | 7.3% |
| Hawaiian/Pacific Islander | 0 | 0.0% | 10 | 5.0% | 10 | 3.3% |
| Don't know/not sure | 0 | 0.0% | 1 | 0.5% | 1 | 0.3% |
| Other | 4 | 4.0% | 7 | 3.5% | 11 | 3.7% |
| Ethnicity (n, %) |  |  |  |  |  |  |
| Hispanic/Latino | 30 | 15.0% | 36 | 18.0% | 66 | 22.0% |
| Not Hispanic/Latino | 69 | 34.5% | 162 | 81.0% | 231 | 77.0% |
| Don't know/not sure | 1 | 0.5% | 2 | 1.0% | 3 | 1.0% |
| Highest level of education |  |  |  |  |  |  |
| Did not complete high school | 12 | 12.0% | 19 | 9.5% | 31 | 10.3% |
| High school graduate or equivalent | 29 | 29.0% | 56 | 28.0% | 85 | 28.3% |
| Some college, no degree | 22 | 22.0% | 50 | 25.0% | 72 | 24.0% |
| Associate's degree | 13 | 13.0% | 22 | 11.0% | 35 | 11.7% |
| Bachelor's degree | 16 | 16.0% | 36 | 18.0% | 52 | 17.3% |
| Some graduate courses, no degree | 3 | 3.0% | 2 | 1.0% | 5 | 1.7% |
| Graduate degree or higher | 5 | 5.0% | 15 | 7.5% | 20 | 6.7% |
| Household income |  |  |  |  |  |  |
| $14,999 or less | 18 | 18.0% | 24 | 12.0% | 42 | 14.0% |
| $15,000 to $24,999 | 6 | 6.0% | 26 | 13.0% | 32 | 10.7% |
| $25,000 to $34,999 | 3 | 3.0% | 21 | 10.5% | 24 | 8.0% |
| $35,000 to $49,999 | 18 | 18.0% | 37 | 18.5% | 55 | 18.3% |
| $50,000 to $74,999 | 28 | 28.0% | 46 | 23.0% | 74 | 24.7% |
| $75,000 to $99,999 | 11 | 11.0% | 16 | 8.0% | 27 | 9.0% |
| $100,000 to $149,999 | 10 | 10.0% | 14 | 7.0% | 24 | 8.0% |
| $150,000 or more | 2 | 2.0% | 10 | 5.0% | 12 | 4.0% |
| Don't know/not sure | 3 | 3.0% | 0 | 0.0% | 3 | 1.0% |
| Prefer not to answer | 1 | 1.0% | 6 | 3.0% | 7 | 2.3% |
| Health insurance* |  |  |  |  |  |  |
| Employer-sponsored or commercial | 25 | 25.0% | 37 | 18.5% | 62 | 20.7% |
| Medicaid | 43 | 43.0% | 102 | 51.0% | 145 | 48.3% |
| Medicare | 39 | 39.0% | 81 | 40.5% | 120 | 40.0% |
| Other | 5 | 5.0% | 24 | 12.0% | 29 | 9.7% |
| Not insured | 2 | 2.0% | 3 | 1.5% | 5 | 1.7% |

*Respondents could select more than one option and thus results total more than 100%.

**Supplemental Figure 1** MaxDiff results by respondent group


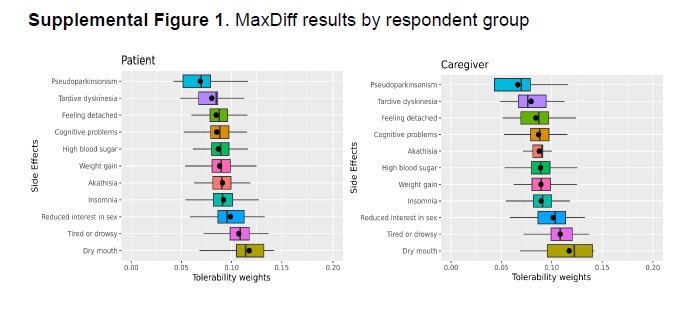

Supplement: Supplementary file 1 [file get_supplementary_file.php]
